# Supplementary material for: The QTL and Candidate Genes Regulating the Early Tillering Vigor Traits of Late-Season Rice in Double-Cropping Systems
Source: MDPI journal article supplement (doi:10.3390/ijms25031497), 2024-01-25
Supplement: s1 [file s1]

# Supplementary\_Material

## Supplementary Figures

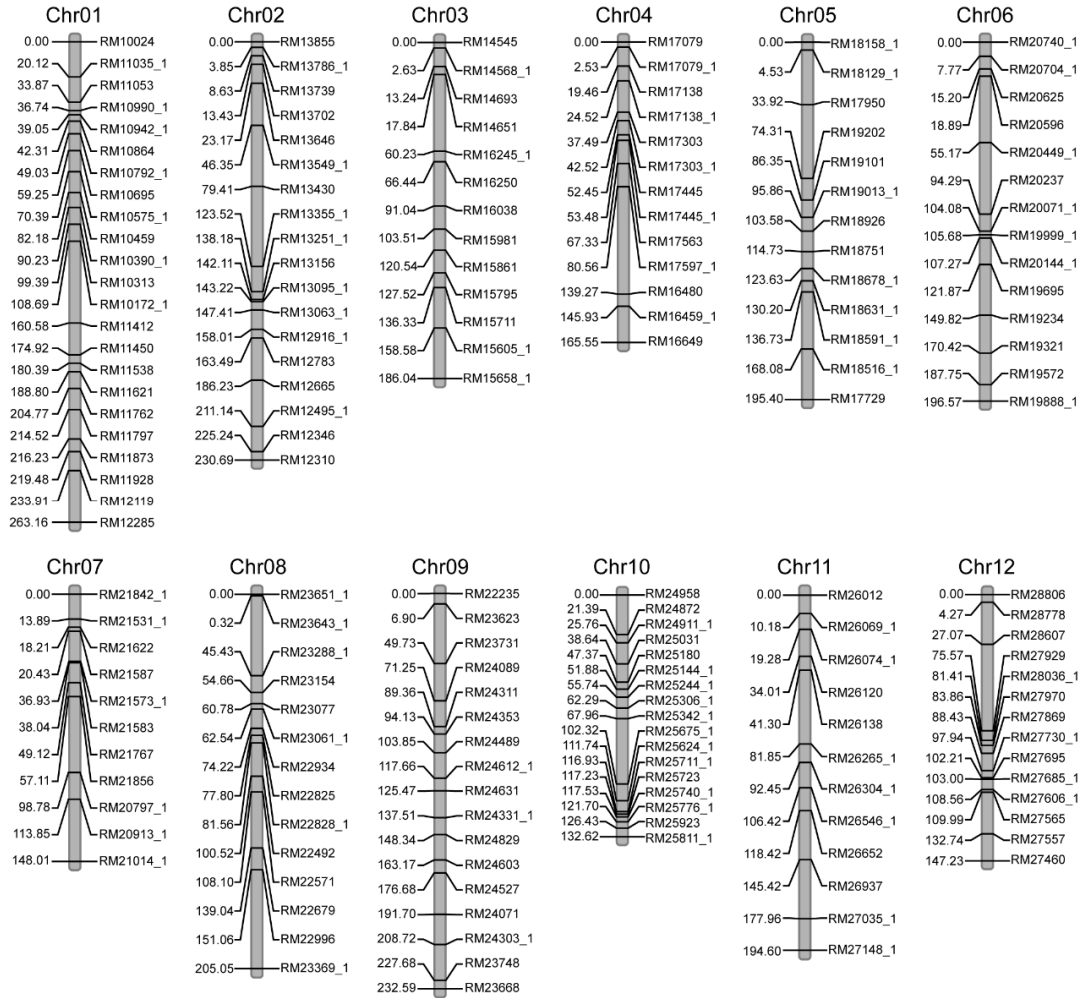

**Figure S1.** The genetic linkage map constructed by polymorphic SSR markers. SSR indicate simple sequence repeat.

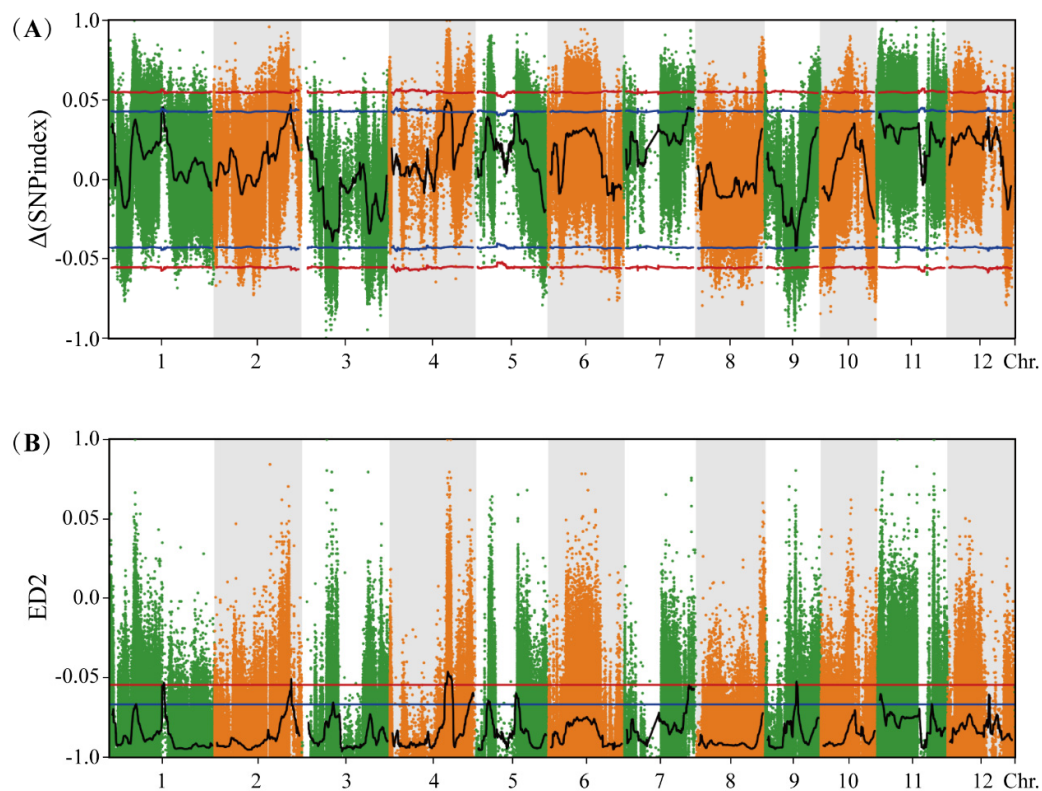

**Figure S2.** The QTLs determined by SNP-index algorithm and ED algorithm. QTL indicates quantitative trait locus, SNP indicates single-nucleotide polymorphism, ED indicates Euclidean distance.

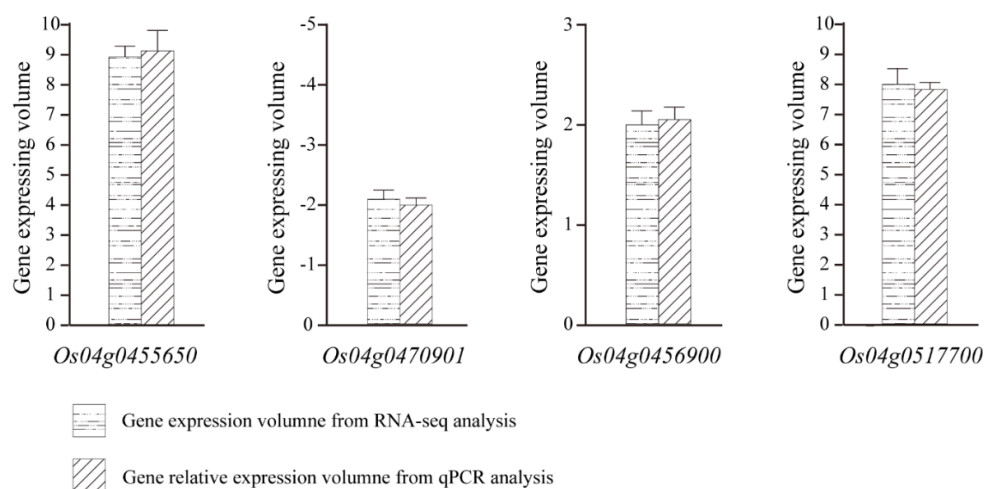

**Figure S3.** Gene expression pattern verified by qPCR. Four genes were randomly selected, and the gene expression pattern from RNA-seq analysis and qPCR analysis were shown in the same histogram. qPCR was performed according to our previous method (Liao et al., *BMC Genomics* 2015) and ACT1 (GenBank ID: AK100267) was the rice reference gene.

The relative expression level of each gene was calculated using the 2-( $\Delta\Delta C_t$ ) method as our previous method (Liao et al., *BMC Genomics* 2015). Three biological replicates were performed for the qPCR experiment.

**Figure S4.** The flow chart of the BIL group construction. ♂ indicates male and ♀ indicates female; × and ⊗ indicate crossing and selfing, respectively.

**Table S1.** Mapping results of RNA sequencing reads from rice tillering nodes.

“SM” and “TM” indicate the mix sample of early-tillering rice lines and late-tillering rice lines; “1”, “2”, “3” and “4” indicate four biological replicates.

**Table S2.** Differentially expressed genes in the candidate region and their functional annotation.

| Gene ID             | Location (bp)         | Symbol   | Functional Description                                           | log <sub>2</sub> FC(T/S) |
|---------------------|-----------------------|----------|------------------------------------------------------------------|--------------------------|
| <i>Os04g0455650</i> | 22795530-<br>22796751 | -        | Conserved hypothetical protein                                   | 9.06                     |
| <i>Os04g0470901</i> | 23527103-<br>23527678 | -        | Hypothetical gene                                                | -2.03                    |
| <i>Os04g0456900</i> | 22834019-<br>22835912 | OsEIL6   | Ethylene-insensitive 3, putative,<br>expressed                   | 2.04                     |
| <i>Os04g0497300</i> | 24875271-<br>24875935 | -        | ATOZI1, putative, expressed                                      | 9.74                     |
| <i>Os04g0500600</i> | 24982051-<br>24983036 | -        | Hypothetical protein                                             | -4.21                    |
| <i>Os04g0506800</i> | 25307143-<br>25308493 | -        | Sialyltransferase family domain<br>containing protein, expressed | 2.61                     |
| <i>Os04g0507400</i> | 25346878-<br>25348347 | -        | Transferase family protein, putative,<br>expressed               | 7.85                     |
| <i>Os04g0517700</i> | 25884579-<br>25885741 | OsWAK51  | OsWAK51 - OsWAK receptor-like<br>protein kinase, expressed       | 7.98                     |
| <i>Os04g0522500</i> | 26130711-<br>26134356 | OsGA2ox6 | Gibberellin 2-beta-dioxygenase 7,<br>putative, expressed         | 2.40                     |
| <i>Os04g0534600</i> | 26720079-<br>26721025 | PEX11-4  | Peroxisomal biogenesis factor 11,<br>putative, expressed         | 2.44                     |
